# Supplementary material
Source: PubMed Central journal article supplement (PMC6002698)
Supplement: MCB.00051-18_zmb999101785s1.pdf [file MCB.00051-18_zmb999101785s1.pdf]

Table S1. Nucleotide sequences of shRNAs used for gene knockdown

| shRNA      | Sense strand                                                                                   | Antisense Strand                                                                             |
|------------|------------------------------------------------------------------------------------------------|----------------------------------------------------------------------------------------------|
| SCR        | 5'-GATCCATGTA <b>CTGCGCGTGGAGAC</b> TTCAAGA<br>GAGTCTCCACGCGCAGTACATTC <b>TTTTTTGGAAA</b> -3'  | 5'-AGCTTTTCCAAAAA <b>AGAGCTATGAAGATT</b> CGATT<br>TCTCTTGAA <b>GTCTCCACGCGCAGTACATG</b> -3'  |
| hHSF1-KD   | 5'-GATCCAGGTTGTT <b>TCATAGTCAGAA</b> TTCAAGAGA<br>TTCTGACTATGAACA <b>ACTGCTTTTTTTGGAAA</b> -3" | 5'-AGCTTTTCCAAAAA <b>GCAGGTTGTTTCATAGTCAGAA</b><br>TCTCTTGAA <b>TTCTGACTATGAACAACCTG</b> -3' |
| hPARP1-KD  | 5'-GATCCGATAGAGCGTGA <b>AGGCGAA</b> CTCAAGAGA<br>TTCGCCTT <b>CACGCTCTATCTTTTTTTGGAAA</b> -3'   | 5'-AGCTTTTCCAAAA <b>AGATAGAGCGTGAAGGCGAA</b><br>TCTCTTGAG <b>TTCGCCTTCACGCTCTATCG</b> -3'    |
| hPARP13-KD | 5'-GATCCGAGTAGCACTT <b>GTTAACGA</b> TTCAAGAGA<br>TCGTTAACA <b>AGTGCTACTCTTTTTTTGGAAA</b> -3'   | 5'-AGCTTTTCCAAAA <b>AGAGTAGCACTTGTTAACGA</b><br>TCTCTTGAA <b>TCGTTAACAAGTGCTACTCG</b> -3'    |

Table S2. Primer sequences used for RT-PCR

| RT-PCR  | Forward primer                 | Reverse primer                 |
|---------|--------------------------------|--------------------------------|
| hHSP110 | 5'-ACCCGTTGTAACACAACCGAAA-3'   | 5'-AGGAATCTGAAAGTTACCAAGGCA-3' |
| hHSP90  | 5'-ACCGATTGGTGACATCTCCATGCT-3' | 5'-CCAGGTGTTTCTTTGCTGCCATGT-3' |
| hHSP70  | 5'-AGAGCCGAGCCGACAGAG-3'       | 5'-CACCTTGCCGTGTTGGAA-3'       |
| hHSP40  | 5'-CCCTCATGCCATGTTTGCTGAGTT-3' | 5'-CCAAAGTTCACGTTGGTGAAGCCA-3' |
| hHSP27  | 5'-AACGAGATCACCATCCAGTACCTT-3' | 5'-TAAGGCTTACTTGGCGGCAGTCT-3'  |
| hactin  | 5'-GTGCCCATCTACGAGGGGTATG-3'   | 5'-GTGCCCATCTACGAGGGGTATG-3'   |

Table S3. Primer sequences used for qRT-PCR

| Real-time PCR | Forward primer              | Reverse primer              | Probe                                            |
|---------------|-----------------------------|-----------------------------|--------------------------------------------------|
| hHSP70        | 5'-GCCGAGAAGGACGAGTTGA-3'   | 5'-CCTGGTACAGTCCGCTGATGA-3' | 5'-FAM-TTACACACCTGCTCCAGCTC<br>CTTCTCTT-TAMRA-3' |
| hGAPDH        | 5'-GTTTCGACAGTCAGCCGCATC-3' | 5'-GGAATTTGCCATGGGTGGA-3'   | 5'-FAM-ACCAGGCGCCCAATACGAC<br>CAA-TAMRA-3'       |

Table S4. Primer sequences used for CHIP assay

| CHIP-qPCR                      | Forward primer                 | Reverse primer                 |
|--------------------------------|--------------------------------|--------------------------------|
| hHSP70-1 (1) (-1506 to -1411)  | 5'-AACGACATGGCACTCCAGAC-3'     | 5'-CGCCCTTAAACCCTTTATTGA-3'    |
| hHSP70-1 (2) (-693 to -602)    | 5'-GCCTTTCAGGTTTCAATCAA-3'     | 5'-GCTGCGTAATCTGGACGTTT-3'     |
| hHSP70-1 (3) (-221 to -144)    | 5'-CCCTGTCCCCTCCAGTGAAT-3'     | 5'-GGACCAATCAGAGGCCAGAGT-3'    |
| hHSP70-1 (4) (-129 to -48)     | 5'-GGCAGGACGGGAGGCGAAAC-3'     | 5'-CTTTTCCCTTCTGAGCCAATCA-3'   |
| hHSP70-1 (5) (+20 to +80)      | 5'-GCTGCGACAGTCCACTACCTT-3'    | 5'-CTGGGAAGCCTTGGGACAA-3'      |
| hHSP70-1 (6) (+385 to +452)    | 5'-AACCAGGTGGCGCTGAAC-3'       | 5'-CCGAACTTGGCGCCAAT-3'        |
| hHSP70-1 (7) (+898 to +978)    | 5'-GGGTGGGAGGACTTTGACAACAGG-3' | 5'-TGGCTGATGCTCTTCTGTG-3'      |
| hHSP70-1 (8) (+1191 to +1277)  | 5'-TGGACAAGGCCAGATTCA-3'       | 5'-TGAAGAAGTCTGCAGCAGCTT-3'    |
| hHSP70-1 (9) (+1486 to +1586)  | 5'-GACGCAGATCTTACCACCT-3'      | 5'-GCCCAACAGATTGTTGTCT-3'      |
| hHSP70-1 (10) (+1895 to +1990) | 5'-AAGATCAGCGAGGCGGACAAGAA-3'  | 5'-TCCTCTTGTGCTCAAACCTCGTCT-3' |
| hIntergenic (+2784 to +2840)   | 5'-CCCAGGAAGCAGTGGTAGCA-3'     | 5'-GCCCAGGCTAGAGTGAATG-3'      |
